# Supplementary material
Source: PubMed Central journal article supplement (PMC365764)
Supplement: pnas_101_9_3184__2.pdf [file pnas_101_9_3184__2.pdf]

**Table 2: Categories Identified for Hippocampal Neurons**

| Cell/Category:              | Cells responded to:                     | Cells did not respond to:        | Example Category Images                                                               |
|-----------------------------|-----------------------------------------|----------------------------------|---------------------------------------------------------------------------------------|
| M1-212-3a<br>Single Person  | Single person, front view, color or B/W | Same colors, no people, outlines |    |
| M1-312-3b<br>Single Person  | Single person, front view, color or B/W | Same colors, no people, outlines |    |
| M2-509-3a<br>Single Person  | Single person, front view, color or B/W | Same colors, no people, outlines |    |
| M2-118-1c<br>Single Person  | Single person, front view, color or B/W | Same colors, no people, outlines |    |
| M1-110-1b<br>People (group) | 2 or more people, group, color or B/W   | Single person, objects, faces    |    |
| M2-404-1c<br>People (group) | 2 or more people, group, color or B/W   | Single person, objects, faces    |   |
| M2-214-1b<br>People (group) | 2 or more people, group, color or B/W   | Single person, objects, faces    |  |
| M1-227-3c<br>Faces/Eyes     | Full face eyes, mouth, color or B/W     | Blurred facial features, objects |  |
| M2-322-1a<br>Faces/Eyes     | Full face eyes, mouth, color or B/W     | Blurred facial features, objects |  |
| M2-1031-3b<br>Faces/Eyes    | Full face eyes, mouth, color or B/W     | Blurred facial features, objects |  |

**Table 2: Categories Identified for Hippocampal Neurons (Continued)**

| Category:                     | Cells responded to:                 | Cells did not respond to:      | Example Category Images                                                               |
|-------------------------------|-------------------------------------|--------------------------------|---------------------------------------------------------------------------------------|
| M1-304-3b<br>Monkeys          | Chimpanzee, baboon, gorilla         | People, other animals, objects |    |
| M2-111-3b<br>Monkeys          | Chimpanzee, baboon, gorilla         | People, other animals, objects |    |
| M2-1217-3a<br>Monkeys         | Chimpanzee, baboon, gorilla, mouse? | People, other animals, objects |    |
| M1-307-3a<br>Animals (4-legs) | Animals, figures showing 3-4 legs   | People, objects, faces         |    |
| M2-316-3a<br>Animals (4-legs) | Animals, figures showing 3-4 legs   | People, objects, faces         |    |
| M1-605-1a<br>Silhouettes      | Black & white objects, silhouettes  | Colors, line drawings          |   |
| M2-116-3a<br>Silhouettes      | Black & white objects, silhouettes  | Colors, line drawings          |  |
| M1-1120-1c<br>Line Drawing    | Line drawings, outlines             | Colors, silhouettes            |  |
| M1-109-3a<br>Line Drawing     | Line drawings, outlines             | Colors, silhouettes            |  |
| M2-503-3c<br>Line Drawing     | Line drawings, outlines             | Colors, silhouettes            |  |

**Table 2: Categories Identified for Hippocampal Neurons (Continued)**

| Category:                    | Cells responded to:                               | Cells did not respond to:            | Example Category Images                                                               |
|------------------------------|---------------------------------------------------|--------------------------------------|---------------------------------------------------------------------------------------|
| M2-218-3b<br>Line Drawing    | Line drawings, outlines                           | Colors, silhouettes                  |    |
| M2-412-1c<br>Picture-3D      | Perspective, multi-color, background & foreground | White backgrounds, line drawings, 2D |    |
| M2-426-3b<br>Picture-3D      | Perspective, multi-color, background & foreground | White backgrounds, line drawings, 2D |    |
| M1-125-1c<br>Color (vs. B/W) | Multiple colored objects and/or animals, etc.     | Monochrome or black & white          |    |
| M1-305-3a<br>Color (vs. B/W) | Multiple colored objects and/or animals, etc.     | Monochrome or black & white          |    |
| M1-123-1a<br>Color (vs. B/W) | Multiple colored objects and/or animals, etc.     | Monochrome or black & white          |   |
| M2-328-3c<br>Color (vs. B/W) | Multiple colored objects and/or animals, etc.     | Monochrome or black & white          |  |
| M1-111-1b<br>Color: Blue     | Mostly blue objects, animals, humans, scenes      | Other colors, black & white          |  |
| M1-207-3a<br>Color: Blue     | Mostly blue objects, animals, humans, scenes      | Other colors, black & white          |  |
| M2-1221-3a<br>Color: Blue    | Mostly blue objects, animals, humans, scenes      | Other colors, black & white          |  |

**Table 2: Categories Identified for Hippocampal Neurons (Continued)**

| Category:                   | Cells responded to:                         | Cells did not respond to:             | Example Category Images                                                               |
|-----------------------------|---------------------------------------------|---------------------------------------|---------------------------------------------------------------------------------------|
| M1-309-3b<br>Color: Red     | Mostly red objects, animals, humans, scenes | Other colors, black & white           |    |
| M1-515-3c<br>Color: Red     | Mostly red objects, animals, humans, scenes | Other colors, black & white           |    |
| M2-506-1c<br>Color: Red     | Mostly red objects, animals, humans, scenes | Other colors, black & white           |    |
| M2-206-3a<br>Color: Green   | Mostly red objects, animals, humans, scenes | Other colors, black & white           |    |
| M1-131-3a<br>Arrows         | Angular, single pointed objects             | Other shapes with similar orientation |    |
| M2-109-1b<br>Arrows         | Angular, single pointed objects             | Other shapes with similar orientation |   |
| M1-213-1c<br>Round/Circular | Round, ball-like objects, circles, rings    | Other shapes with less curvature      |  |
| M2-325-3a<br>Round/Circular | Round, ball-like objects, circles, rings    | Other shapes, with less curvature     |  |
| M2-301-3a<br>Round/Circular | Round, ball-like objects, circles, rings    | Other shapes with less curvature      |  |
| M1-411-3c<br>Stars          | Angular, multiple pointed objects           | Other shapes w/o multiple points      |  |

**Table 2: Categories Identified for Hippocampal Neurons (Continued)**

| Category:                      | Cells responded to:                     | Cells did not respond to:              | Example Category Images                                                               |
|--------------------------------|-----------------------------------------|----------------------------------------|---------------------------------------------------------------------------------------|
| M2-115-3c<br>Stars             | Angular, multiple pointed objects       | Other shapes w/o multiple points       |    |
| M1-228-1a<br>Rectangle/square  | Blocks, rectangles or squares           | Other shapes, balls, circles, ellipses |    |
| M1-327-3b<br>Rectangle/square  | Blocks, rectangles or squares           | Other shapes, balls, circles, ellipses |    |
| M2-417-3b<br>Rectangle/square  | Blocks, rectangles or squares           | Other shapes, balls, circles, ellipses |    |
| M2-405-3a<br>Rectangle/square  | Blocks, rectangles or squares           | Other shapes, balls, circles, ellipses |    |
| M2-418-3a<br>Abstract/Angles   | Color or B/W patterns, lines and shades | People, stars, balls other shapes      |   |
| M1-314-3c<br>Fruit             | Photos or paintings of fruit            | Cartoons, B/W, outlines, people        |  |
| M1-306-1b<br>Fruit             | Photos or paintings of fruit            | Cartoons, B/W, outlines, people        |  |
| M2-1018-1a<br>Cars/Trucks/Toys | Objects with wheels                     | Blocks or circles alone-unconnected    |  |
