# Supplementary material
Source: PubMed Central journal article supplement (PMC365764)
Supplement: pnas_101_9_3184__4.pdf [file pnas_101_9_3184__4.pdf]

Category: **Single Person** – *Cell fired*

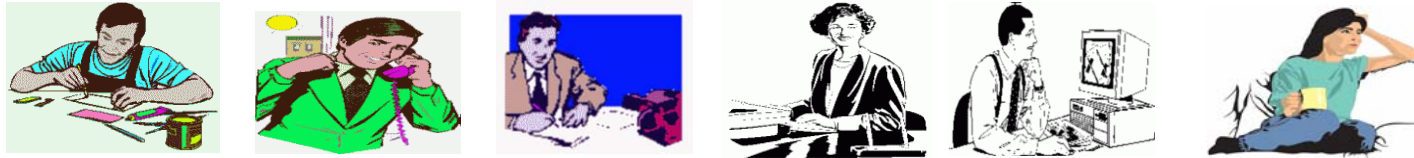

Non-Category Images – *Cell did not fire*

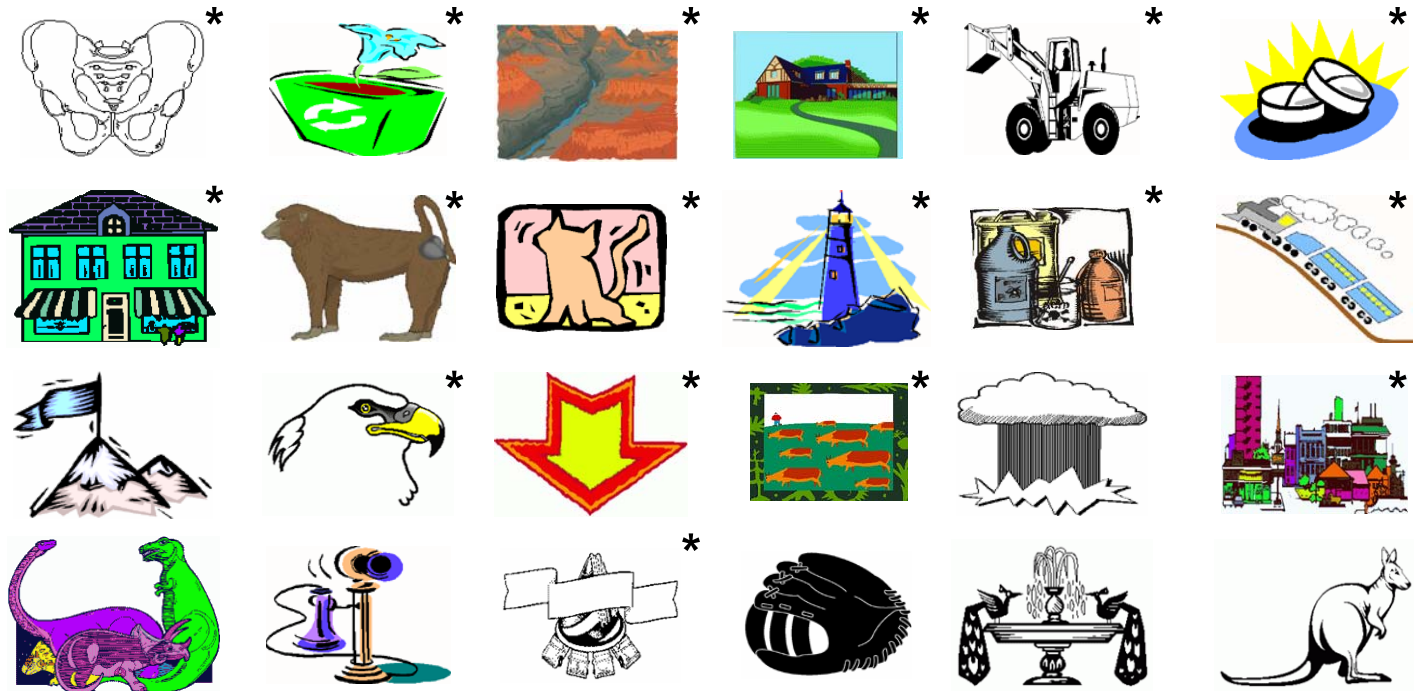

Row-Category images

Columns-images presented with category images

\* Presented on same trial as above category image
