# Supplementary material
Source: PubMed Central journal article supplement (PMC365764)
Supplement: pnas_101_9_3184__6.pdf [file pnas_101_9_3184__6.pdf]

Category: **Color-Blue** – Cell fired

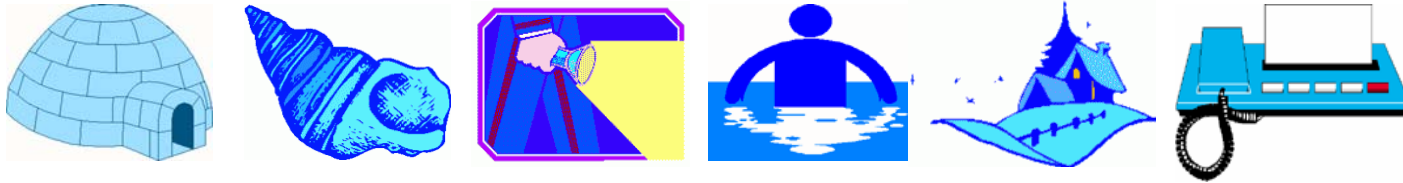

Non-Category Images – Cell did not fire

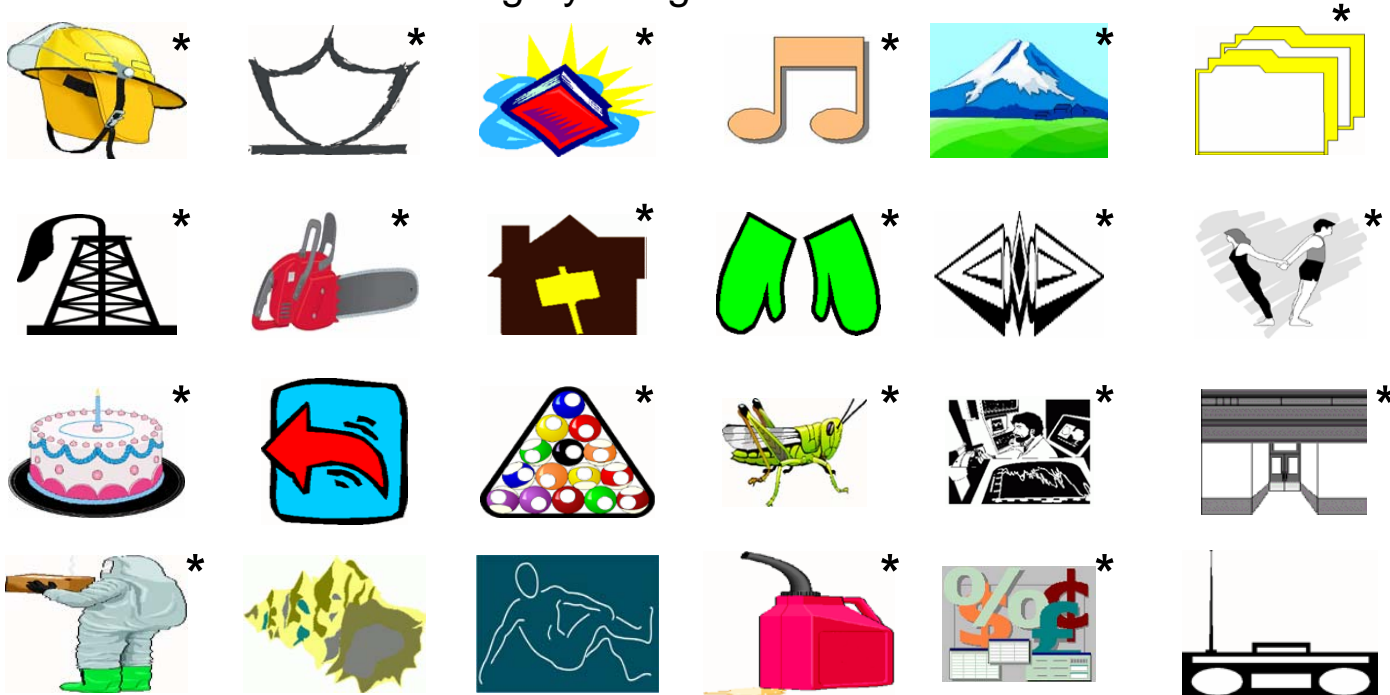

Row-Category images

Columns-images presented with category images

\* Presented on same trial as above category image
