# Supplementary material
Source: PubMed Central journal article supplement (PMC365764)
Supplement: pnas_101_9_3184__8.pdf [file pnas_101_9_3184__8.pdf]

Cell 131-3a, Monkey 1

Category Images: **Arrows** – Cell fired

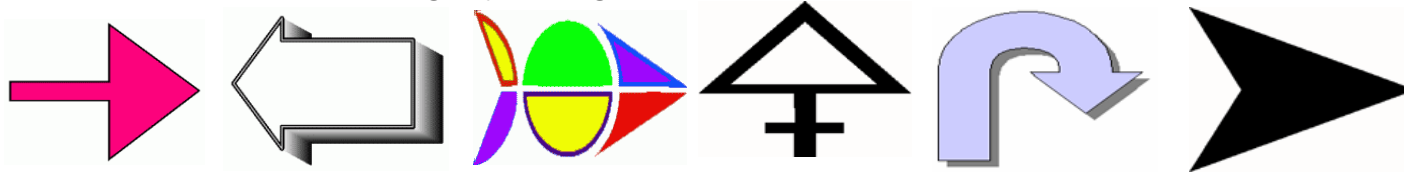

Non-Category Images – Cell did not fire

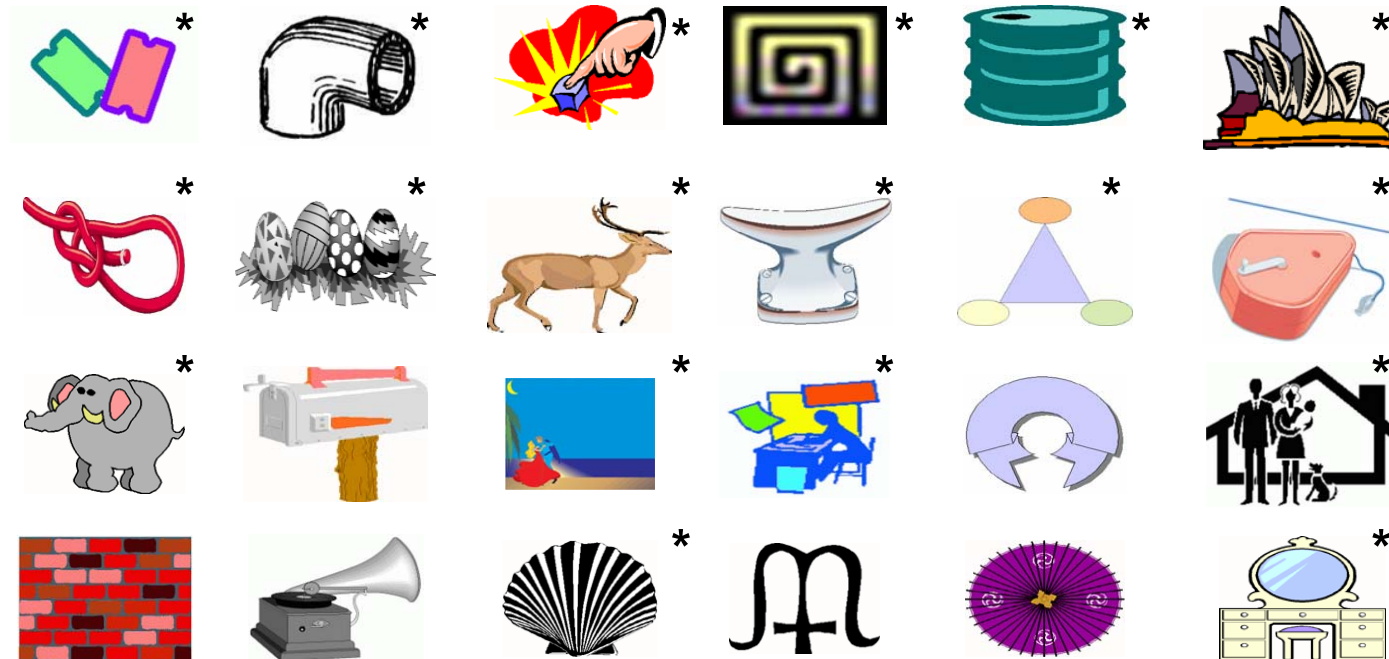

Top Row = Category images

Columns = Non-category images

\* Presented on same trial as above category image
